# Supplementary material for: De Novo Transcriptome Sequencing and Analysis of the Cereal Cyst Nematode, Heterodera avenae
Source: PLoS One. 2014 May 6;9(5):e96311. doi: 10.1371/journal.pone.0096311 (PMC4011697; doi:10.1371/journal.pone.0096311)
Supplement: Table S1 — Primer information and BLASTN search results for the genes used for quantitative real time PCR. (XLSX) [file pone.0096311.s003.xlsx]

## Sheet: Table S2
Gene name/product	Accession number	Species	Primer (RT PCR)	Product size (bp)
CRE-VHA-5 protein	XP_002166572	Hydra magnipapillata	F:- 5' TTTGCTATGAAGGCCTGTGCAACG 3'	195
			R:- 5' TCTTGGCATTGTCCTCGTCCATCT 3'
CBN-AQP-4 protein	XP_002637619	Caenorhabditis briggsae	F:- 5' GCACTGCAATGTGCTGGTGCAATA 3'	160
			R:- 5' TTAGTGCTGAAGCTTTGCGTTGGC 3'
Ran-BPM	ADY02949	Globodera pallida	F:- 5' GACATCGTCGGATGTGGACTGAAT 3'	171
			R:- 5' CAATTCGTCGGTGTCGTTTGGCAT 3'
Spectraplakin like	XP_003136092	Loa loa	F:- 5'GCACATATTCGCTCAGTGAGGTGT 3'	161
			R:- 5' CTCTTGTCCACTCACAATTCGCGT 3'
CLAVATA		Heterodera avenae	F:- 5’ GCTTTGTGTGCCGTTTCACTCCAT 3’	191
			R:- 5’ GCTGCTGGTGGTTGATATGCGTTT 3’
CAEBREN_25536	EGT33067.1	Caenorhabditis brenneri	F:- 5’ CCGCGCAATGTAAAGGTCAACCAA 3’	194
			R:- 5’ TTGGTTTCTCCGTCGATTTGCCTG 3’
Receptor family ligand binding region containing protein	XP_001895190.1	Brugia malayi	F:- 5’ CGCATTTATTGGCTGCTTCGTCGT 3’	175
			R:- 5’ CGTTGTTGTTGTGCTCGTCGTCTT 3’
Chitinase-like protein	ADY41923.1	Ascaris suum	F:- 5’ CCCAATTTCTTTCGCCGCTATGCT 3’	183
			R:- 5’ TGTTCGGCTCTCATGACCTTCTCA 3’
superoxide dismutase	XP_002148586.1	Talaromyces marneffei	F:-5’ CAATGTAAACCATGCAGCAGCGGA 3’	164
			R:-5’ TGTCATGCACAACCAATGCACGTC 3’
Oxidoreductase dhs-27	ADY46975.1	Ascaris suum	F:- 5’ AGCCCGTGGAAATGCGATAAATGC 3’	104
			R:- 5’ AACACAATACGCTGCGGAAGATGC 3’
CAEBREN_07082	EGT48330.1	Caenorhabditis brenneri	F:-5’ TTGTGTTTAGCCACAAGTACGGGC 3’	174
			R:-5’ ACGGAACCATGCATCGGAATCTCT 3’
'Paired box' domain containing protein	XP_001897922.1	Brugia malayi	F:-5’ TGCCTTCTTTCTCCGCTTCCGTTA 3’	198
			R:-5’ AATCTCCGCTGAGTTCGGTTAGCA 3’
Chitin binding Peritrophin-A domain containing protein	XP_001900473.1	Brugia malayi	F:-5’ ATCCTTAGGCACCCATTTCCCACT 3’	163
			R:-5’ GCGTTGTGTCGCCGGAAATTGTAA 3’
CBN-FAT-5 protein	EGT49222.1	Caenorhabditis brenneri	F:-5’ TTACGCTCACTTCGCAGCAAACAC 3’	163
			R:-5’ TGGAGCAGCACAAAGAGGATGACA 3’
dorsal gland cell-specific expression protein	ADI82807.1	Heterodera avenae	F:-5’ AATGGCACGACTTTGGAGCGTTTG 3’	195
			R:-5’ ACAAATTGGGCCGATGTCTTTGGG 3’
pfam02414 Borrelia_orfA			F:- 5’ CGTCCGCAAGCTTGTAGAGCATTT 3’	121
			R:- 5’ TTGGTAACTTGGCCTTCGCCTTTG 3’
CAEBREN_19301	EGT58928.1	Caenorhabditis brenneri	F:- 5’ CGTTTCGTGCCGATTTAATGCCCT 3’	186
			R:- 5’ GAGCAAGGGAAAGCGTTGCAAGTA 3’
CLF_100574	GAA47606.1	Clonorchis sinensis	F:- 5’ ATAACGAAGTCGGAGGGAGAACCA 3’	120
			R:- 5’ AAGAGGGAGGGAGCACTCTGAAAT 3’
CBG10845	XP_002644906.1	Caenorhabditis briggsae	F:- 5’ TCCTGCACATTTCTGTGGTCCTGA 3’	174
			R:- 5’ ACGAAACGCTTCGCTTCTCTGACA 3’
OsI_22746	EEC80500.1	Oryza sativa	F:- 5’ TCTTTGGAAGAACGGGACCGAGTT 3’	183
			R:- 5’ TTCAAGTGCCCGCTCCCTGTAATA 3’
Radixin	AES05475.1	Mustela putorius furo	F:- 5’ AGGCAACTCGATGTACACACGGAA 3’	163
			R:- 5’ AAACGAGTCTCATCTTGGCGCTCT 3’
Dynein light chain 2	ADY49659.1	Ascaris suum	F:- 5’ GCCGAACTTGGTCGAGCAAACAAT 3’	144
			R:- 5’ AAACTTCGTCCCACCACACAATGC 3’
Hypothetical protein	XP_001899179.1	Brugia malayi	F:- 5’ AACATGCTTCGTTTGTACAGCGGC 3’	120
			R:- 5’ ACTTTGGTCCGTCCCTTTGTCTCA 3’
IMG5_133010	EGR30402.1	Ichthyophthirius multifiliis	F:- 5’ TTCATTGCCATTGGCGTCGTTGTC 3’	143
			R:- 5’ AGCAACACCACCATCTCCACTGAT 3’
Annexin A8	NP_001087286.1	Xenopus laevis	F:- 5’ AGATTCTCTTCGTCCTCCGCCTTT 3’	174
			R:- 5’ GGCATCACGCACCAATGACCAAAT 3’
CAEBREN_17602	EGT36475.1	Caenorhabditis brenneri	F:- 5’ AGTCGGTTGATTTGGTGCAGGAGA 3’	131
			R:- 5’ TTTCTTCCTCCCTTCGGCAGTTGT 3’
Putative gland protein G12H04	AAO85452.1	Heterodera glycines	F:- 5’ TGCCCTTACTTCTCGGTGTCCAAA 3’	133
			R:- 5’ ACTGTTAGCTGTGCATCGGGTGAA 3’
b-1,4 endoglucanase	ACO55952	Heterodera avenae	F:- 5’ TCCGCCAGCATCAATGTACTCTCA 3’	145
			R:- 5’ ACGCGTTACCAATAGTGGTCCCTT 3’
Pectate lyase	ADD82848	Heterodera avenae	F:- 5’ ATTGGTCCGTGCATGTGGAAACTG 3’	134
			R:- 5’ TGATGGTCGCCTGATCGCCATAAT 3’
Serine protease	ACA30304	Gnathostoma spinigerum	F:- 5’ ACCATTGGAGGCGAGCAATTAACG 3’	200
			R:- 5’ CGTTGTCGGCCCAAACACTCATTT 3’
